# Supplementary material
Source: publisher figshare collection journal article supplement (https://tandf.figshare.com/ndownloader/files/15577349)
Supplement: Supplementary file 1 [file 15577349]

**Supplementary Information**

Pyridine-based complexes of copper(II) chloride and bromide: ligand conformation effects on crystal structure. Synthesis, structure and magnetic behavior of Cu(2‑Cl‑3‑X’py)2X2 [X, X’ = Cl, Br]

ROBERT J. DUBOIS, CHRISTOPHER P. LANDEE, MELANIE RADEMEYER and MARK M. TURNBULL*


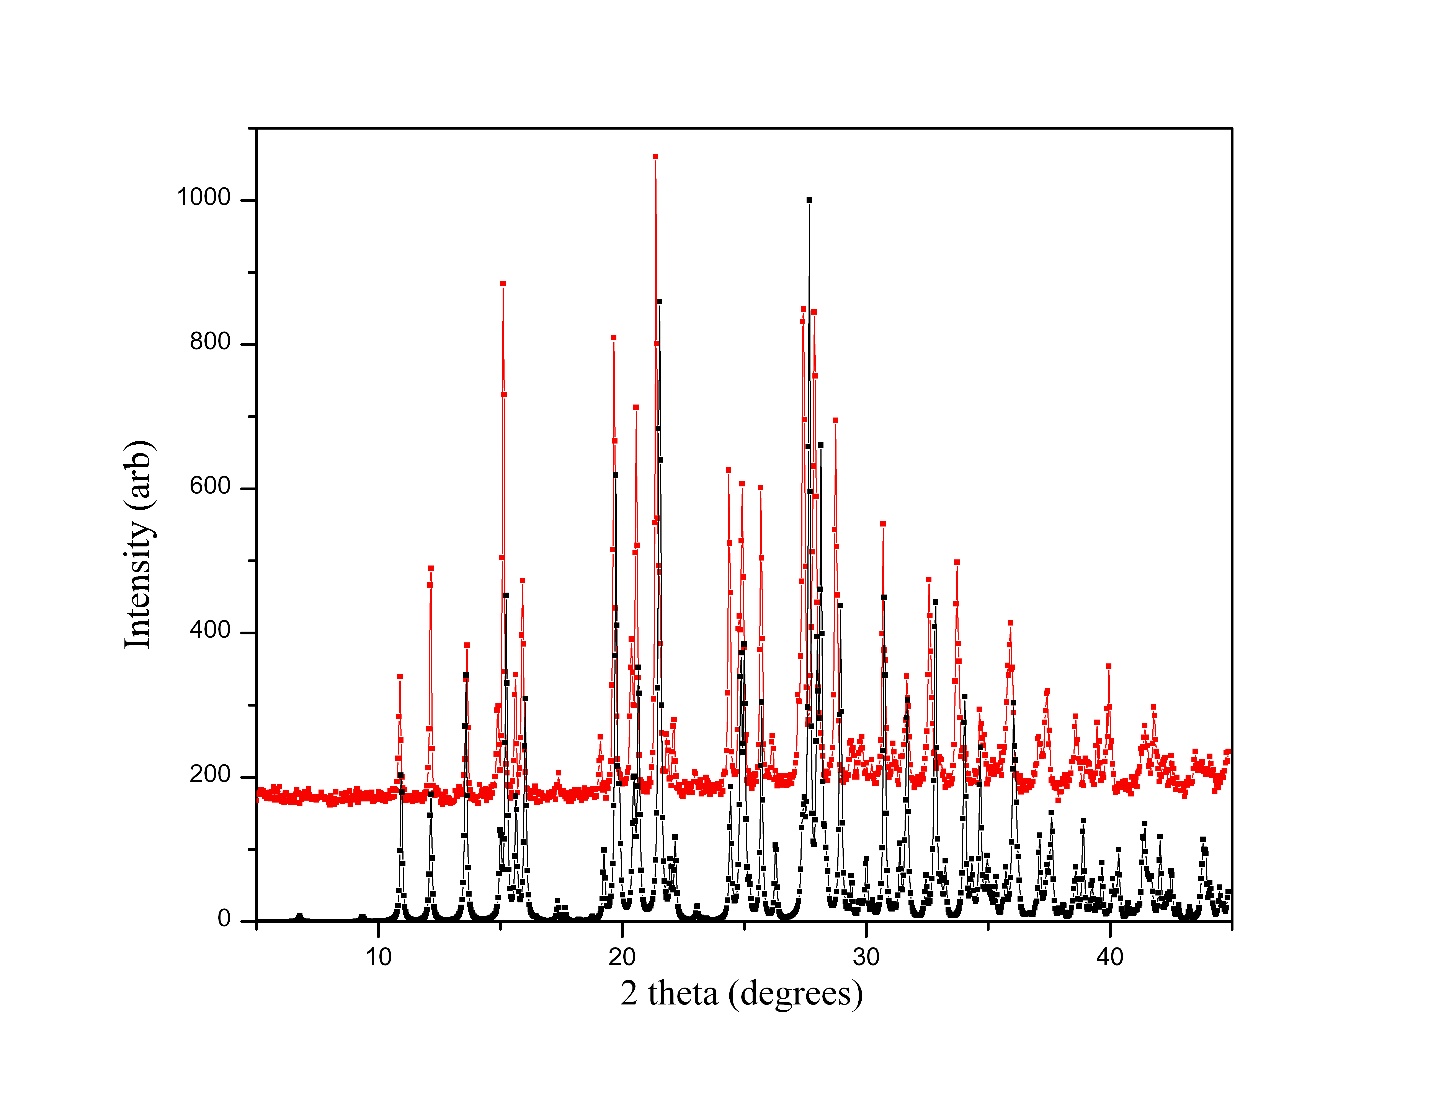


Figure S1. Comparison of experimental (red, upper) and theoretical (black, lower) powder patterns for **1**.


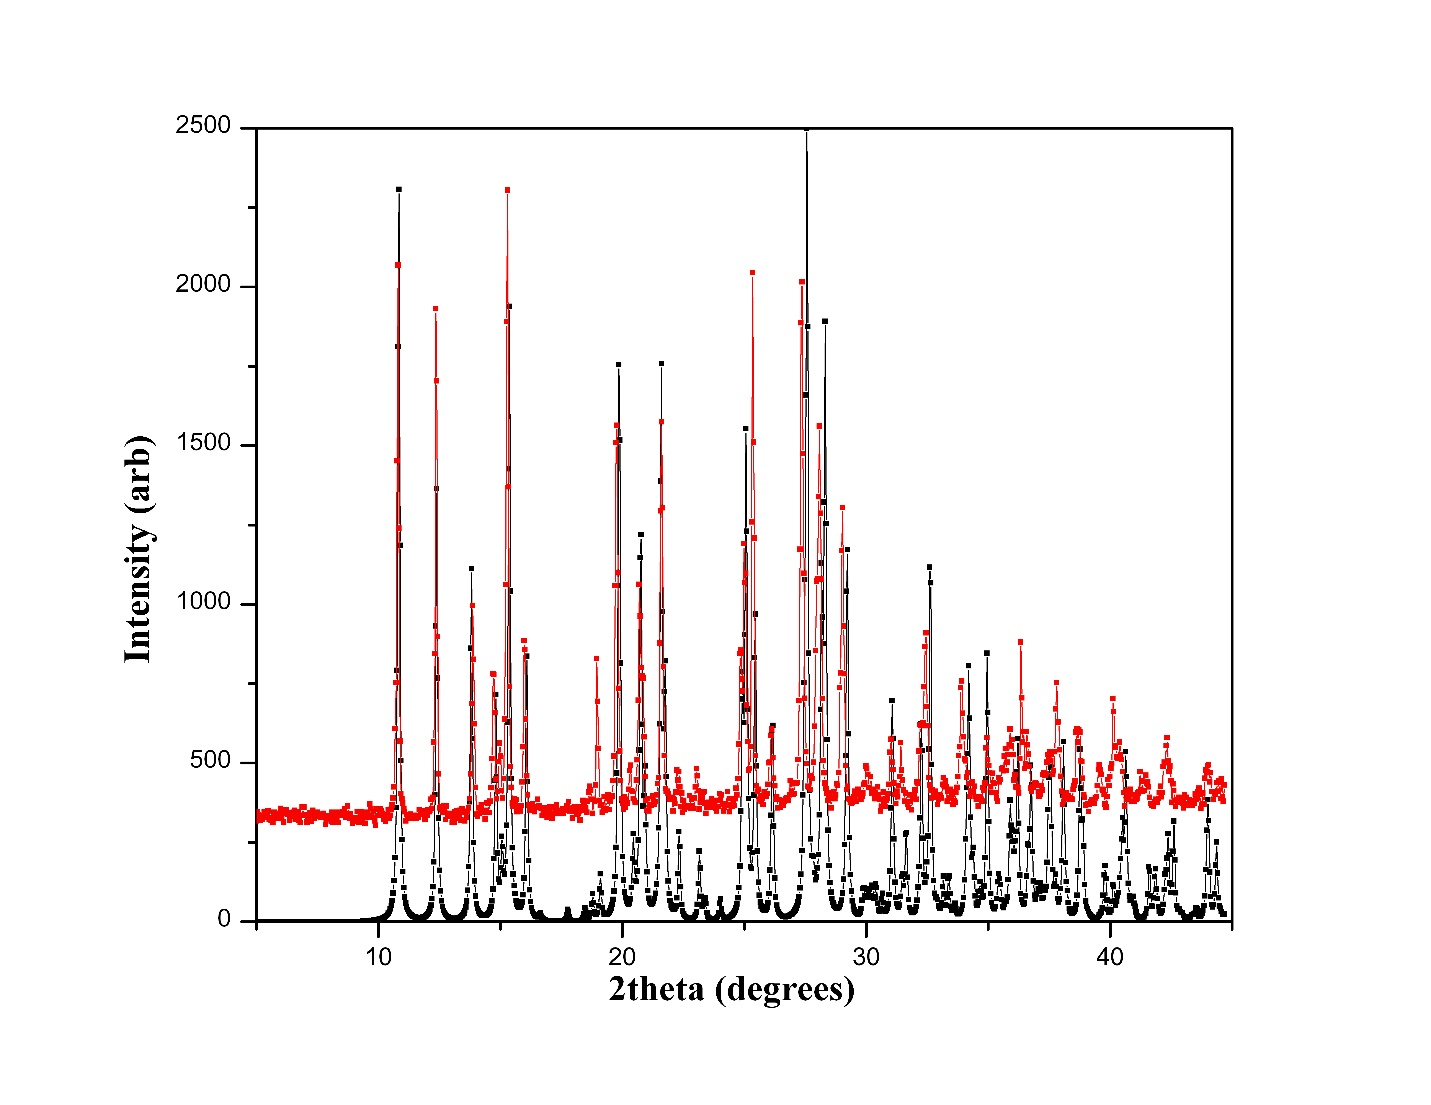


Figure S2. Comparison of experimental (red, upper) and theoretical (black, lower) powder patterns for **3**.


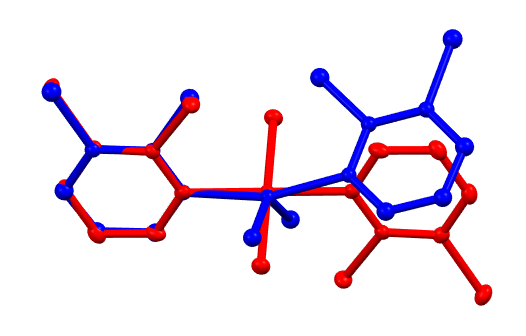


Figure S3. Superposition of the two crystallographically independent molecules of **1**. The figure was generated using Mercury Version 4.0.0 (C.F. Macrae, P.R. Edgington, P. McCabe, E. Pidcock, G. P. Shields, R. Taylor, M. Towler, J. van de Streek. *J. Appl. Cryst.*, **39**, 453 (2006)).
